# Supplementary material for: Development and Evaluation of Cannabidiol Orodispersible Tablets Using a 23-Factorial Design
Source: MDPI journal article supplement (doi:10.3390/pharmaceutics14071467), 2022-07-14
Supplement: s1 [file s1]

## Supplementary materials

### Selectivity

To verify the selectivity of an ODT without CBD, an ODT containing all components except the API was prepared. The composition can be found in **Table S1**.

**Table S1.** The composition of the ODT without API.

| Code   | Amount (mg) |
|--------|-------------|
| PETsp  | 84.22       |
| PODTG2 | 84.22       |
| CCS    | 3.75        |
| EMCS   | 3.75        |
| SRB    | 6.56        |
| MNT    | 5           |
| PLX407 | 10          |
| BFL    | 2.5         |

### Linearity

Linearity was verified over a calibration range of 0.5 and 10  $\mu\text{g/mL}$  using five concentrations. The equation obtained was  $y=23559x+675.69$ , while the coefficient of correlation was  $R^2=0.9997$ .

### Specificity

The retention time in optimal condition was 2.8 min, which can be considered fast. While using a blank sample (dissolution media) or the ODT without CBD, no interferences were observed, as can be seen in **Figure S1**.

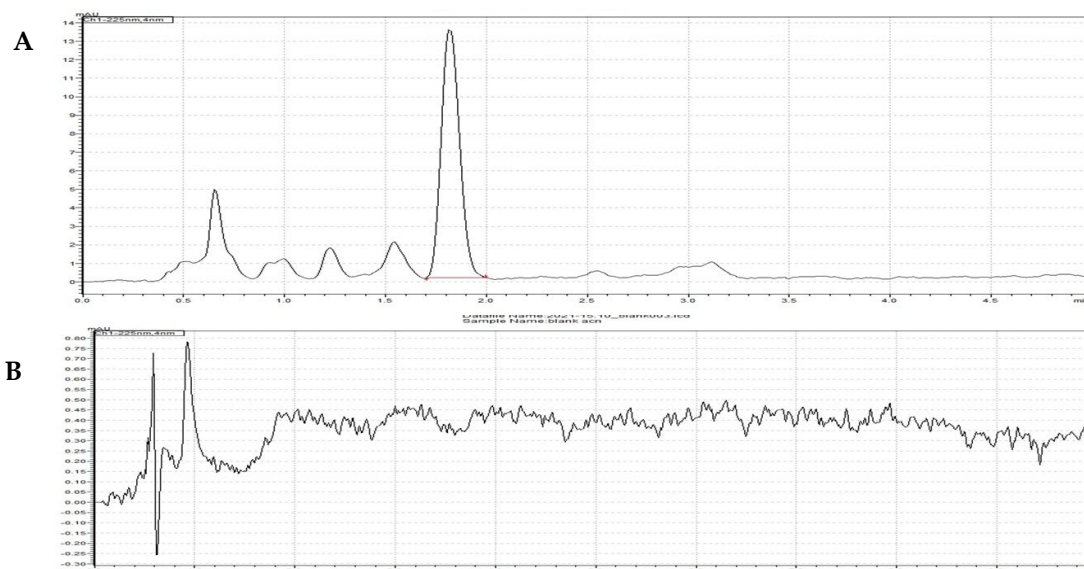

**Figure S1.** The chromatograms for the CBD ODT without API (A) and blank solution (B).

## Carry-over

Three solutions with concentrations of 0.5  $\mu\text{g/ml}$ , 2.5  $\mu\text{g/ml}$ , and 10  $\mu\text{g/ml}$  were injected. Before and after each solution, a blank sample consisting of dissolution media was injected. Carry-over phenomena were observed at none of the concentrations. The lack of carry-over for the 10  $\mu\text{g/ml}$  concentration is presented in **Figure S2**.

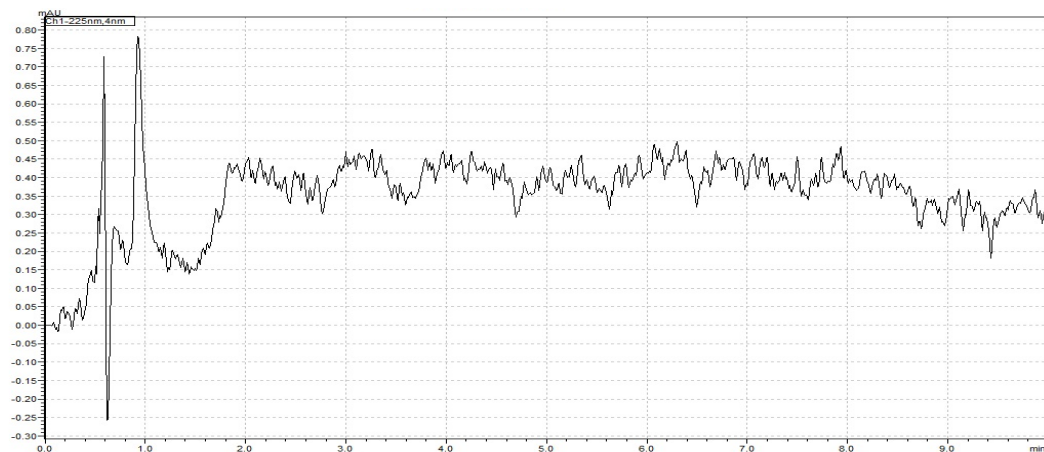

**Figure S2.** Carry-over for the 10  $\mu\text{g/ml}$  concentration.

## Accuracy and precision

To verify the precision of the method, three levels of concentrations were used to evaluate the amount of CBD released: 0.5  $\mu\text{g/ml}$  (LLOQ – lowest limit of quantification), 2.5  $\mu\text{g/ml}$  (IQCS – intermediate quality control standard), and 10  $\mu\text{g/ml}$  (ULOQ – the upper limit of quantification). The ULOQ was chosen taking into consideration the maximum concentration that might be obtained theoretically. The LLOQ was set at 0.5  $\mu\text{g/ml}$  (5% of the ULOQ). In the pharmaceutical industry during analytical method validation, this is a value that is often used, and considering the pharmaceutical formulation that has to be developed, a high concentration of API has to be released in a short time. The coefficient of variation was between 0.56 and 0.95%, while the accuracy's coefficient of variation were in the range of 99.11-101.09%. The chromatograms for LLOQ and ULOQ are presented in **Figure S3**.

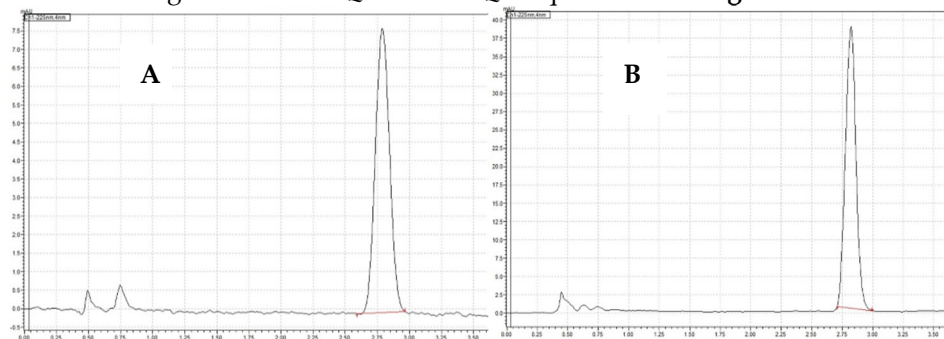

**Figure S3.** The chromatograms for LLOQ (A) and ULOQ (B )

**Table S2.** The extended list of coefficients of tablet dependent variables

| Terms                         | Variables |        |        |        |       |        |        |        |        |
|-------------------------------|-----------|--------|--------|--------|-------|--------|--------|--------|--------|
|                               | Y1        | Y2     | Y3     | Y4     | Y5    | Y6     | Y7     | Y8     | Y9     |
| <b>Intercept</b>              | 0.446     | 41.50  | 1.41   | 60.45  | 67.43 | 78.28  | 83.91  | 87.32  | 95.42  |
| <b>X1 (PODTG2)</b>            | -0.021    | -7.83  | 0.097  | -      | -     | -      | -      | -      | -      |
| <b>X1 (PETsp)</b>             | 0.021     | 7.83   | -0.097 | -      | -     | -      | -      | -      | -      |
| <b>X1 (PODTG2)* X2 (EMCS)</b> | -         | -      | -      | -      | -     | -      | -      | -      | -      |
| <b>X1 (PODTG2)* X2 (CCS)</b>  | -         | -      | -      | -      | -     | -      | -      | -      | -      |
| <b>X1 (PETsp)* X2 (EMCS)</b>  | -         | -      | -      | -      | -     | -      | -      | -      | -      |
| <b>X1 (PODTG2)* X2 (CCS)</b>  | -         | -      | -      | -      | -     | -      | -      | -      | -      |
| <b>X2 (EMCS)</b>              | -         | -      | -      | -      | -     | -      | -      | -      | -      |
| <b>X2 (CCS)</b>               | -         | -      | -      | -      | -     | -      | -      | -      | -      |
| <b>X3</b>                     | 0.025     | -11.21 | 0.256  | 9.54   | 14.47 | 18.53  | 19.39  | 16.72  | 16.07  |
| <b>X1 (PODTG2)*X3</b>         | -0.119    | 7.19   | -      | -      | -     | -      | -      | -      | -      |
| <b>X1 (PETsp)*X3</b>          | 0.119     | -7.19  | -      | -      | -     | -      | -      | -      | -      |
| <b>X2 (EMCS)*X3</b>           | -         | -      | -      | -      | -     | -      | -      | -      | -      |
| <b>X2 (CCS)*X3</b>            | -         | -      | -      | -      | -     | -      | -      | -      | -      |
| <b>X3*X3</b>                  | -         | -      | -      | -37.23 | -34.4 | -36.11 | -36.19 | -34.48 | -36.03 |
